# Supplementary material for: The Serum Expression of Selected miRNAs in Pulmonary Sarcoidosis with/without Löfgren’s Syndrome
Source: Hindawi journal article supplement (doi:10.1155/2016/1246129), 2016-01-01
Supplement: f1 [file 1246129.f1.zip]

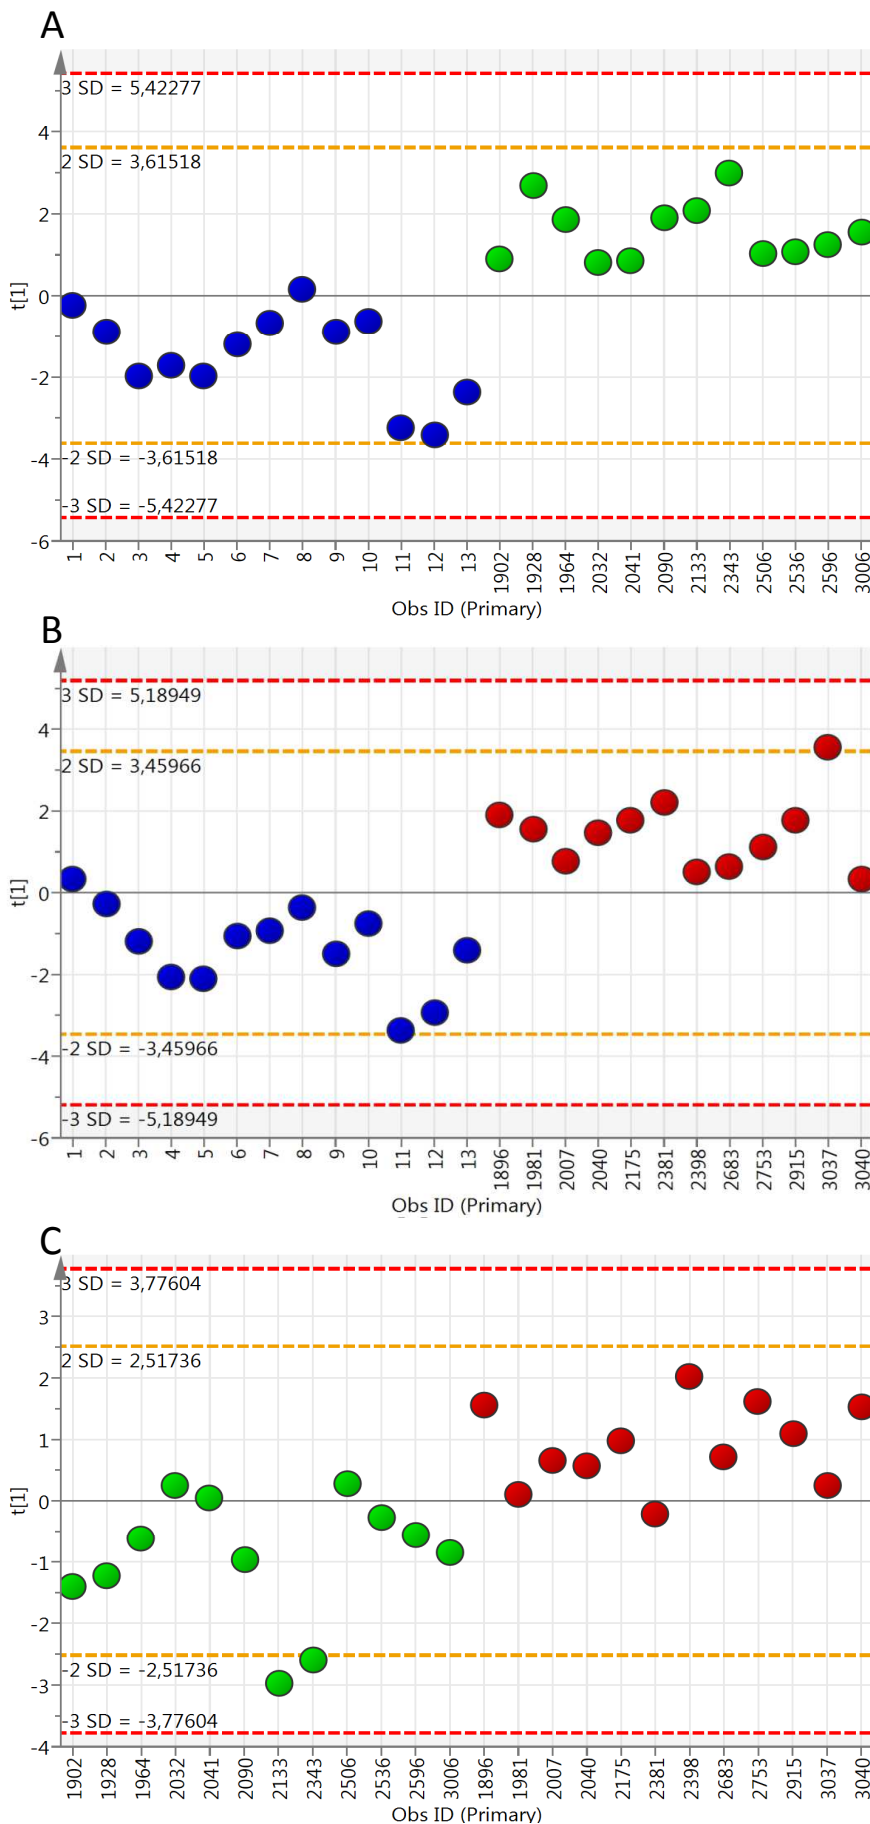

**Online resource 2:** Our OPLS modelling showed significant separation between our sarcoidosis patients and healthy controls (A: healthy controls vs Löfgren's syndrome and B: healthy controls vs an insidious onset of pulmonary sarcoidosis). Three miRNAs (c: miR-21, miR-340 and miR-212) did not provide a good model to separate our sarcoidosis patients according to the presence/absence of Löfgren's syndrome. (blue, healthy controls; green, Löfgren's syndrome and red, an insidious onset of pulmonary sarcoidosis)
