# Supplementary material for: The Serum Expression of Selected miRNAs in Pulmonary Sarcoidosis with/without Löfgren’s Syndrome
Source: Hindawi journal article supplement (doi:10.1155/2016/1246129), 2016-01-01
Supplement: f1 [file 1246129.f1.zip]

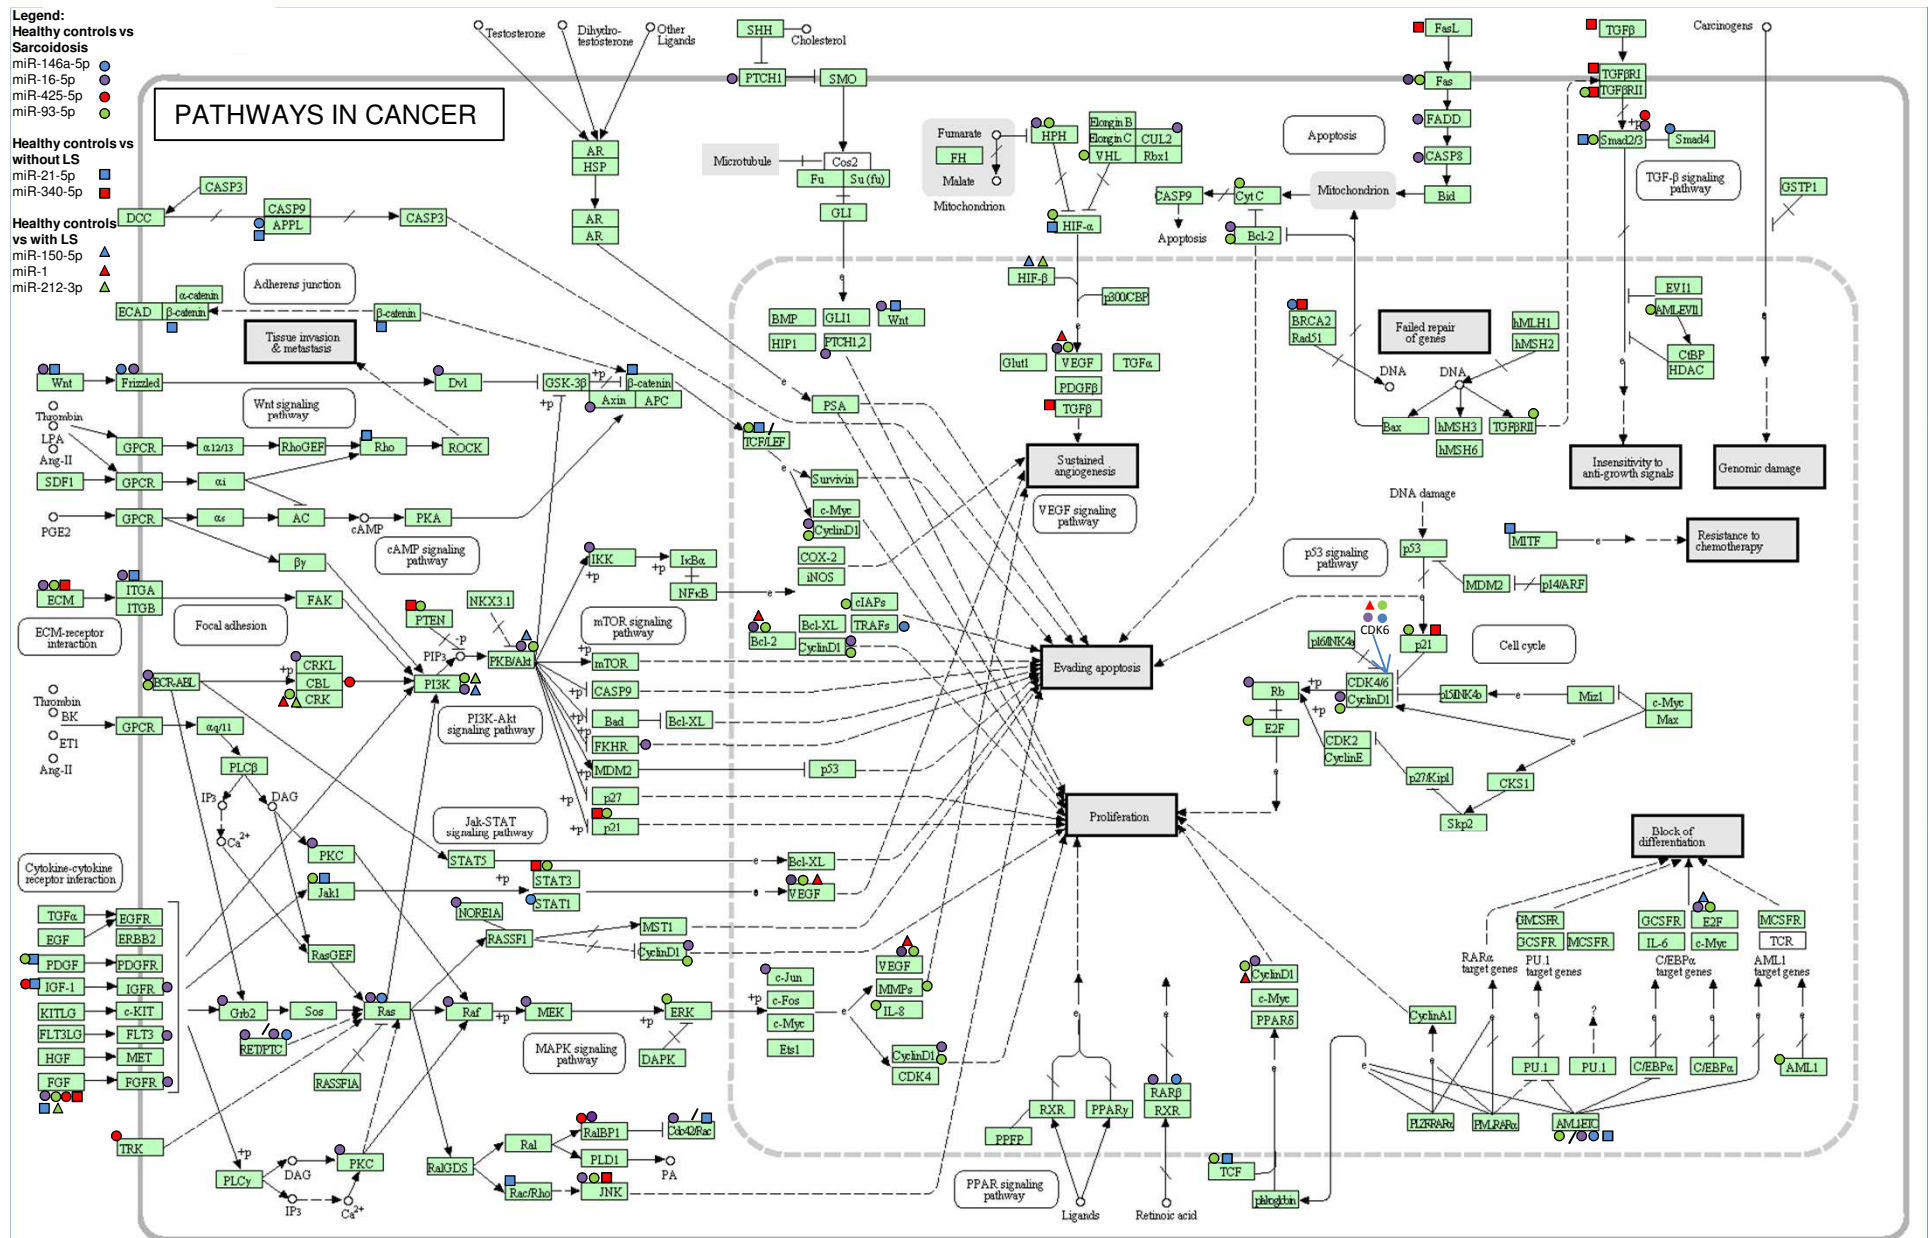

**Online Resource 3: A,** the Pathways in cancer with its highest MiRSystem score among KEGG pathways was consistently predicted to be affected by both expression profiles that were dysregulated in our patients with/without Löfgren's syndrome (LS) compared to healthy controls; a circle, 4 miRNAs (miR-146a-5p, miR-16-5p, miR-425-5p, miR-93-5p) were consistently dysregulated in both sarcoidosis groups compared to healthy controls; a square: 2 (miR-340-5p, miR-21-5p) miRNAs were only dysregulated in sarcoidosis with LS compared to healthy controls; a triangle, 3 miRNAs (miR-150-5p, miR-1, miR-212-3p) were only dysregulated in sarcoidosis without LS compared to healthy controls

**Legend:**  
 with LS vs without LS  
 miR-21-5p ●  
 miR-340-5p ●  
 miR-212-3p ●

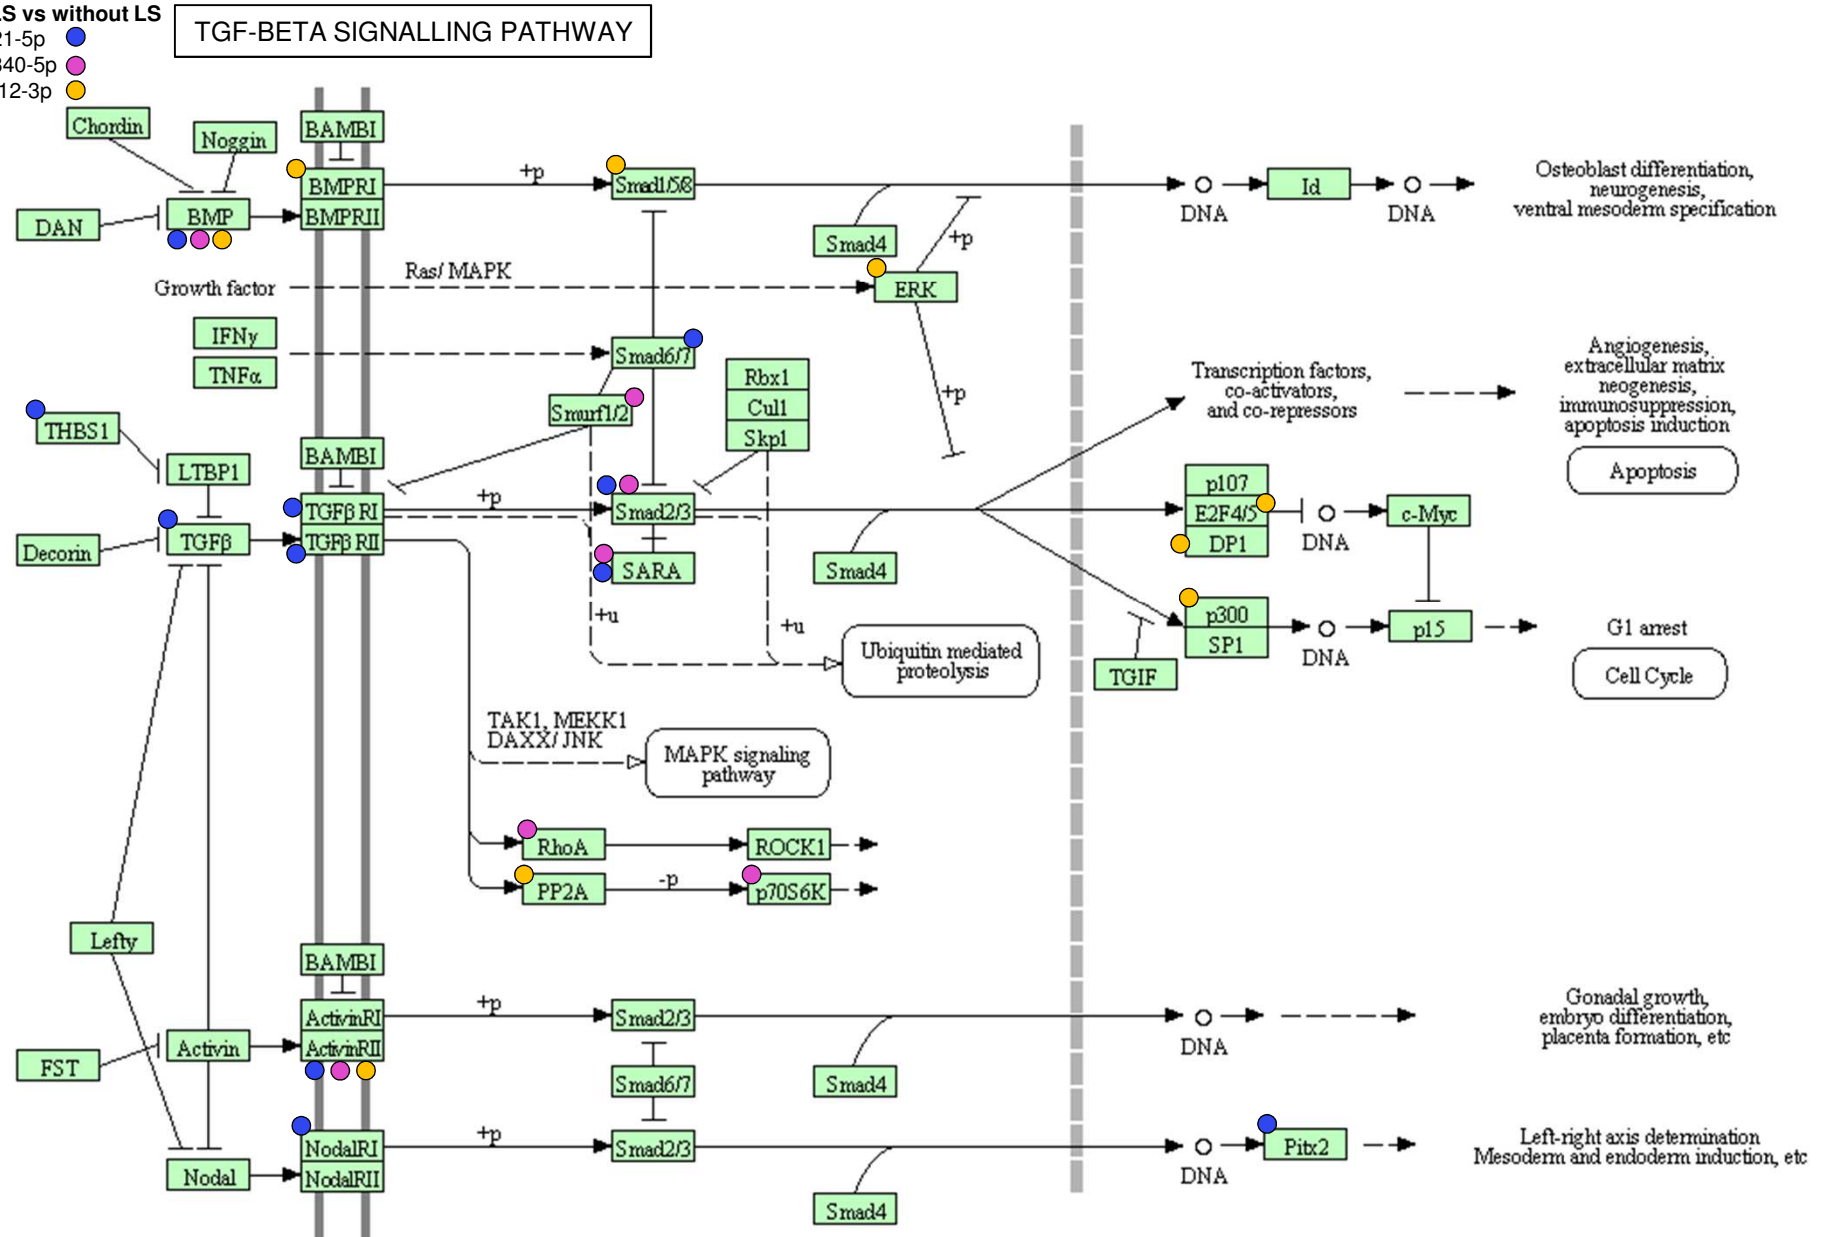

**Online Resource 3: B,** the TGF-beta signalling pathway with its highest MiRSystem score among KEGG pathways was predicted to be affected by the cumulative effect of three miRNAs whose serum expressions were dysregulated between our patients with Löfgren's syndrome and those without Löfgren's syndrome; 3 miRNAs (miR-340-5p, miR-212-3p and miR-21-5p) were only dysregulated in sarcoidosis with LS compared to that without LS
