# Supplementary material for: The Serum Expression of Selected miRNAs in Pulmonary Sarcoidosis with/without Löfgren’s Syndrome
Source: Hindawi journal article supplement (doi:10.1155/2016/1246129), 2016-01-01
Supplement: f1 [file 1246129.f1.zip]

| miRNA name               | miRNA ID  | miRNA sequence           |
|--------------------------|-----------|--------------------------|
| let-7a-5p                | ID 000377 | UGAGGUAGUAGGUUGUAUAGUU   |
| miR-1                    | ID 002222 | UGGAAUGUAAAGAAGUAUGUAU   |
| miR-16-5p                | ID 000391 | UAGCAGCACGUAAAUAUUGGCG   |
| miR-17-5p                | ID 002308 | CAAAGUGCUUACAGUGCAGGUAG  |
| miR-19a-3p               | ID 000395 | UGUGCAAAUCUAUGCAAAACUGA  |
| miR-19b-3p               | ID 000396 | UGUGCAAAUCCAUGCAAAACUGA  |
| miR-27a-5p               | ID 002445 | AGGGCUUAGCUGCUUGUGAGCA   |
| miR-29b-3p               | ID 000413 | UAGCACCAUUUGAAAUCAGUGUU  |
| miR-30b-5p               | ID 000602 | UGUAAACAUCCUACACUCAGCU   |
| miR-31-5p <sup>•</sup>   | ID 002279 | AGGCAAGAUGCUGGCAUAGCU    |
| miR-33b-3p <sup>•</sup>  | ID 241007 | CAGUGCCUCGGCAGUGCAGCCC   |
| miR-92b-5p <sup>•</sup>  | ID 002343 | AGGGACGGGACGCGGUGCAGUG   |
| miR-93-5p                | ID 001090 | CAAAGUGCUGUUCGUGCAGGUAG  |
| miR-122a-5p              | ID 002245 | UGGAGUGUGACAAUGGUGUUUG   |
| miR-125a-5p <sup>•</sup> | ID 002198 | UCCCUGAGACCCUUUAACCUGUGA |
| miR-142-5p <sup>•</sup>  | ID 002248 | CAUAAAGUAGAAAGCACUACU    |
| miR-142-3p               | ID 000464 | UGUAGUGUUUCCUACUUUAUGGA  |
| miR-148a-3p              | ID 000470 | UCAGUGCACUACAGAACUUUGU   |
| miR-155                  | ID 000479 | UUA AUGCUAAUCGUGAUAGGGG  |
| miR-181b-1*-3p           | ID 462578 | CUCACUGAACAAUGAAUGCAA    |
| miR-191-5p               | ID 002299 | CAACGGAAUCCCAAAGCAGCUG   |
| miR-193a-3p              | ID 002250 | AACUGGCCUACAAAGUCCCAGU   |
| miR-200b-5p              | ID 002274 | CAUCUUACUGGGCAGCAUUGGA   |
| miR-204-5p               | ID 000508 | UUCCCUUUGUCAUCCUAUGCCU   |
| miR-206 <sup>•</sup>     | ID 000510 | UGGAAUGUAAGGAAGUGUGUGG   |
| miR-212-3p               | ID 000515 | UAACAGUCUCCAGUCACGGCC    |
| miR-214 -3p              | ID 002306 | ACAGCAGGCACAGACAGGCAGU   |
| miR-302c-3p              | ID 000533 | UAAGUGCUUCCAUGUUUCAGUGG  |
| miR-335-5p               | ID 000546 | UCAAGAGCAAUAACGAAAAAUGU  |
| miR-340-5p               | ID 2258   | UUAUAAAGCAAUGAGACUGAUU   |
| miR-362-3p <sup>•</sup>  | ID 002117 | AACACACCUAUUCAAGGAUUCA   |
| miR-425-5p               | ID 001516 | AAUGACACGAUCACUCCCGUUGA  |
| miR-451a                 | ID 001141 | AAACCGUUAACCAUACUGAGUU   |
| miR-487b-3p <sup>•</sup> | ID 1285   | AAUCGUACAGGGUCAUCCACUU   |
| miR-502-5p               | ID 001109 | AUCCUUGCUAUCUGGGUGCUA    |
| miR-505*-5p              | ID 002087 | GGGAGCCAGGAAGUAUUGAUGU   |
| miR-770-5p               | ID 002002 | UCCAGUACCACGUGUCAGGGCCA  |
| miR-21-5p                | ID 000397 | UAGCUUAUCAGACUGAUGUUGA   |
| miR-26a-5p               | ID 000405 | UUCAAGUAAUCCAGGAUAGGCU   |
| miR-146a-5p              | ID 000468 | UGAGAACUGAAUCCAUGGGUU    |
| miR-150-5p               | ID 000473 | UCUCCCAACCCUUGUACCAGUG   |

#### Online Resource 1: A list of TaqMan assays

Legend: <sup>•</sup> These miRNAs were not analysed because of low PCR efficiency
